# Supplementary material for: Genetic Predisposition to In Situ and Invasive Lobular Carcinoma of the Breast
Source: PLOS journal article supplement (doi:10.1371/journal.pgen.1004285), 2014-04-17
Supplement: S11 (10.1371/journal.pgen.1004285.s011) [file journal.pgen.1004285.s011]

**Table S3**

| Genotypes | N Studies | Cases | Controls | OR | (95% CI) | | P value | |
| --- | --- | --- | --- | --- | --- | --- | --- | --- |
|  |  |  |  |  |  |  | |  |
| GG | 36 | 1,739 | 11,728 | 1.00 |  |  | | Ref. |
| AG |  | 3,096 | 17,247 | 1.21 | (1.14, 1.30) | | 5.26E-09 | |
| AA |  | 1,264 | 6,720 | 1.27 | (1.17, 1.38) | | 9.50E-09 | |
| Total |  | 6,099 | 35,695 |  |  |  | |  |
|  |  |  | P for departure from log-additivity | | | | 0.009 | |
