# Supplementary material for: Genetic Predisposition to In Situ and Invasive Lobular Carcinoma of the Breast
Source: PLOS journal article supplement (doi:10.1371/journal.pgen.1004285), 2014-04-17
Supplement: S13 (10.1371/journal.pgen.1004285.s013) [file redirect.do]

## Sheet: Sheet1
Table S5
							Invasive vs controls						LCIS vs controls						P-het		Combined (Invasive + LCIS) vs controls
Cytoband	Genes	RS number / alternate RS no.	Position (NCBI Build 37)	Minor Allele	Other Allele	MAF	Cases	Controls	Genotype counts (cases | controls)	OR (95% CI)	P		Cases	Controls	Genotype counts (cases | controls)	OR (95% CI)	P		(Invasive vs LCIS)		Cases	Controls	Genotype counts (cases | controls)	OR (95% CI)	P
10q26.13	FGFR2	rs2981579	123337335	A	G	0.403986	5622	34272	1505/2812/1305|12136/16542/5594	1.38 (1.32, 1.44)	5.11978e-52		401	24044	120/205/76|8486/11655/3903	1.19 (1.03, 1.37)	0.0192917		0.0446942		6023	34272	1625/3017/1381|12136/16542/5594	1.37 (1.31, 1.42)	1.75028e-51
16q12.1	TOX3	rs3803662	52586341	A	G	0.260975	5619	34255	2556/2510/553|18746/13077/2432	1.33 (1.27, 1.39)	1.10849e-35		401	24033	184/176/41|13303/9142/1588	1.35 (1.16, 1.57)	0.000121638		0.985877		6020	34255	2740/2686/594|18746/13077/2432	1.33 (1.27, 1.39)	8.53372e-38
1p11.2		rs11249433	121280613	G	A	0.401877	5621	34266	1633/2824/1164|12133/16613/5520	1.25 (1.20, 1.30)	2.69388e-25		401	24042	124/191/86|8409/11711/3922	1.15 (1.00, 1.33)	0.0501214		0.935686		6022	34266	1757/3015/1250|12133/16613/5520	1.24 (1.19, 1.29)	1.76377e-25
11q13.3		rs554219	69331642	G	C	0.122441	5620	34266	3996/1483/141|26430/7337/499	1.33 (1.26, 1.41)	1.61324e-22		400	24044	285/108/7|18650/5068/326	1.31 (1.08, 1.60)	0.00724719		0.798385		6020	34266	4281/1591/148|26430/7337/499	1.34 (1.26, 1.41)	1.01963e-23
9q31.2		rs865686	110888478	C	A	0.382461	5622	34271	2475/2491/656|13094/16187/4990	0.83 (0.79, 0.86)	1.00809e-17		401	24044	190/171/40|9041/11426/3577	0.72 (0.61, 0.84)	2.16565e-05		0.122705		6023	34271	2665/2662/696|13094/16187/4990	0.82 (0.79, 0.86)	4.61915e-20
2q35		rs13387042	217905832	G	A	0.491334	5621	34268	1765/2698/1158|9005/17060/8203	0.84 (0.80, 0.87)	5.68337e-17		401	24045	106/216/79|6254/11990/5801	0.90 (0.78, 1.04)	0.144963		0.211002		6022	34268	1871/2914/1237|9005/17060/8203	0.84 (0.81, 0.88)	6.70769e-17
11q13.3		c11_pos69088342 / rs75915166	69379161	A	C	0.059168	5621	34274	4775/816/30|30392/3752/130	1.40 (1.29, 1.51)	1.22967e-16		401	24045	334/66/1|21322/2638/85	1.55 (1.20, 2.01)	0.000778958		0.541383		6022	34274	5109/882/31|30392/3752/130	1.41 (1.31, 1.52)	2.18249e-18
11q13.3		rs614367	69328764	A	G	0.148241	5621	34269	3777/1668/176|24876/8625/768	1.24 (1.18, 1.31)	7.20914e-15		401	24043	270/112/19|17569/5961/513	1.32 (1.10, 1.58)	0.00267615		0.460222		6022	34269	4047/1780/195|24876/8625/768	1.25 (1.18, 1.32)	2.42517e-16
10q21.2	ZNF365	rs10995190	64278682	A	G	0.156819	5622	34264	4232/1307/83|24391/9021/852	0.80 (0.75, 0.85)	1.66655e-13		401	24036	319/78/4|17249/6246/541	0.69 (0.55, 0.87)	0.00157637		0.0934303		6023	34264	4551/1385/87|24391/9021/852	0.79 (0.74, 0.84)	4.78105e-15
5q11.2	MAP3K1	rs889312	56031884	C	A	0.27788	5622	34270	2683/2394/545|17870/13743/2657	1.18 (1.13, 1.23)	9.07502e-13		401	24043	199/168/34|12467/9695/1881	1.05 (0.89, 1.22)	0.57555		0.0276306		6023	34270	2882/2562/579|17870/13743/2657	1.17 (1.12, 1.22)	2.98251e-12
10q22.3	ZMIZ1	rs704010	80841148	A	G	0.38235	5622	34265	1924/2694/1004|13068/16098/5099	1.14 (1.10, 1.19)	3.66179e-10		401	24042	133/191/77|8966/11444/3632	1.15 (0.99, 1.33)	0.0634808		0.489333		6023	34265	2057/2885/1081|13068/16098/5099	1.14 (1.10, 1.19)	1.54791e-10
10p12.31	MLLT10	rs1243182	21916728	A	G	0.322441	5621	34272	2360/2600/661|15701/14989/3582	1.14 (1.09, 1.19)	6.08178e-09		401	24044	156/191/54|10979/10530/2535	1.29 (1.11, 1.49)	0.000783069		0.48648		6022	34272	2516/2791/715|15701/14989/3582	1.15 (1.10, 1.19)	2.95768e-10
4q34.1	ADAM29	rs6828523	175846426	A	C	0.120146	5620	34262	4531/1032/57|26488/7288/486	0.82 (0.77, 0.88)	1.55097e-08		400	24036	313/82/5|18674/5031/331	0.96 (0.77, 1.21)	0.751304		0.207676		6020	34262	4844/1114/62|26488/7288/486	0.83 (0.78, 0.89)	4.03912e-08
8q24.21		rs13281615	128355618	G	A	0.406428	5507	33402	1742/2692/1073|11547/16440/5415	1.13 (1.08, 1.18)	2.06414e-08		398	23360	123/201/74|8082/11496/3782	1.13 (0.97, 1.30)	0.116045		0.855392		5905	33402	1865/2893/1147|11547/16440/5415	1.13 (1.08, 1.18)	8.86851e-09
12p11.22	PTHLH	rs10771399	28155080	G	A	0.119327	5622	34270	4567/1000/55|26675/7108/487	0.83 (0.78, 0.89)	1.71676e-07		401	24043	321/75/5|18636/5069/338	0.88 (0.70, 1.11)	0.274235		0.418605		6023	34270	4888/1075/60|26675/7108/487	0.84 (0.78, 0.89)	1.45417e-07
10p12.31	MLLT10:DNAJC1	rs7072776	22032942	A	G	0.284736	5622	34268	2683/2433/506|17512/13957/2799	1.12 (1.07, 1.17)	4.18965e-07		401	24040	185/181/35|12202/9864/1974	1.17 (1.00, 1.36)	0.050893		0.719629		6023	34268	2868/2614/541|17512/13957/2799	1.12 (1.08, 1.18)	1.33274e-07
16q12.2	MIR1972-2:FTO	rs17817449	53813367	C	A	0.403228	5622	34268	2156/2689/777|12327/16311/5630	0.90 (0.87, 0.94)	3.0851e-06		401	24041	157/188/56|8731/11396/3914	0.91 (0.79, 1.06)	0.230707		0.877432		6023	34268	2313/2877/833|12327/16311/5630	0.91 (0.87, 0.94)	2.24403e-06
5q33.3	EBF1	rs1432679	158244083	G	A	0.432933	5612	34222	1651/2784/1177|11081/16687/6454	1.10 (1.06, 1.15)	6.72732e-06		400	24002	123/186/91|7652/11749/4601	1.06 (0.92, 1.22)	0.395061		0.326678		6012	34222	1774/2970/1268|11081/16687/6454	1.10 (1.05, 1.14)	6.37852e-06
19p13.11	SSBP4:ISYNA1:ELL	rs4808801	18571141	G	A	0.349522	5620	34264	2546/2453/621|14520/15541/4203	0.91 (0.87, 0.95)	8.77365e-06		401	24043	166/183/52|10222/10902/2919	1.01 (0.87, 1.18)	0.848134		0.0882432		6021	34264	2712/2636/673|14520/15541/4203	0.91 (0.87, 0.95)	2.7282e-05
9q31.2		rs10759243	110306115	A	C	0.288169	5620	34266	2723/2354/543|17310/14098/2858	1.10 (1.05, 1.15)	2.43488e-05		401	24044	194/167/40|12326/9801/1917	1.16 (0.99, 1.35)	0.0689574		0.655868		6021	34266	2917/2521/583|17310/14098/2858	1.10 (1.06, 1.15)	9.76802e-06
3p24.1	SLC4A7	rs4973768	27416013	A	G	0.468159	5609	34195	1478/2776/1355|9590/17066/7539	1.09 (1.05, 1.14)	2.75638e-05		401	24002	97/209/95|6734/11993/5275	1.12 (0.97, 1.29)	0.126441		0.682787		6010	34195	1575/2985/1450|9590/17066/7539	1.09 (1.05, 1.14)	1.03901e-05
2q35	DIRC3	rs16857609	218296508	A	G	0.263289	5621	34266	2903/2270/448|18632/13347/2287	1.10 (1.05, 1.15)	3.50122e-05		401	24042	197/166/38|13161/9318/1563	1.25 (1.07, 1.46)	0.00567407		0.625065		6022	34266	3100/2436/486|18632/13347/2287	1.11 (1.06, 1.16)	4.20267e-06
6q25.1	C6orf97	rs12662670	151918856	C	A	0.0728485	5621	34274	4721/854/46|29391/4691/192	1.17 (1.08, 1.26)	4.42306e-05		401	24045	343/55/3|20531/3367/147	1.00 (0.76, 1.31)	0.992802		0.313976		6022	34274	5064/909/49|29391/4691/192	1.16 (1.07, 1.24)	0.000114552
14q13.3	PAX9:SLC25A21	rs2236007	37132769	A	G	0.209727	5621	34267	3691/1712/218|21421/11298/1548	0.90 (0.85, 0.95)	5.97479e-05		401	24040	266/124/11|14983/7967/1090	0.85 (0.71, 1.02)	0.0761684		0.594595		6022	34267	3957/1836/229|21421/11298/1548	0.90 (0.85, 0.94)	1.92261e-05
17q22	COX11	rs6504950	53056471	A	G	0.278606	5620	34271	3029/2198/393|17719/13794/2758	0.91 (0.87, 0.95)	8.03362e-05		401	24042	203/174/24|12474/9633/1935	0.93 (0.79, 1.09)	0.352773		0.848757		6021	34271	3232/2372/417|17719/13794/2758	0.91 (0.87, 0.95)	5.08311e-05
6p23	RABBP9	rs204247	13722523	G	A	0.441191	5621	34268	1654/2803/1164|10808/16767/6693	1.09 (1.04, 1.13)	0.000105158		401	24044	119/199/83|7579/11738/4727	1.09 (0.94, 1.25)	0.253088		0.982741		6022	34268	1773/3002/1247|10808/16767/6693	1.08 (1.04, 1.13)	7.27548e-05
21q21.1	NRIP1	rs2823093	16520832	A	G	0.268541	5622	34272	3148/2118/356|18347/13475/2450	0.91 (0.87, 0.96)	0.000125535		401	24045	217/163/21|12807/9494/1744	0.93 (0.79, 1.09)	0.372857		0.861691		6023	34272	3365/2281/377|18347/13475/2450	0.91 (0.87, 0.96)	9.3241e-05
12q24.21		rs1292011	115836522	G	A	0.417904	5618	34258	2037/2699/882|11689/16626/5943	0.92 (0.89, 0.96)	0.000224147		401	24032	148/187/66|8167/11668/4197	0.91 (0.78, 1.05)	0.186313		0.691052		6019	34258	2185/2886/948|11689/16626/5943	0.92 (0.88, 0.96)	9.94486e-05
22q12.2	EMID1:RHBDD3:EWSR1	rs132390	29621477	G	A	0.0359108	5622	34274	5170/442/10|31933/2303/38	1.21 (1.09, 1.34)	0.000375474		401	24045	379/22/0|22398/1618/29	0.78 (0.51, 1.21)	0.267112		0.194136		6023	34274	5549/464/10|31933/2303/38	1.19 (1.07, 1.32)	0.00126332
11q24.3		rs11820646	129461171	A	G	0.410837	5621	34274	2052/2673/896|11876/16621/5777	0.93 (0.89, 0.97)	0.000552915		401	24045	146/194/61|8320/11675/4050	0.93 (0.80, 1.07)	0.306527		0.798724		6022	34274	2198/2867/957|11876/16621/5777	0.93 (0.89, 0.97)	0.000462559
12q22	NTN4	rs17356907	96027759	G	A	0.301107	5610	34238	2829/2323/458|16722/14352/3164	0.92 (0.88, 0.97)	0.00059227		401	24020	215/154/32|11779/10026/2215	0.86 (0.73, 1.01)	0.0712194		0.285343		6011	34238	3044/2477/490|16722/14352/3164	0.92 (0.88, 0.96)	0.000199225
10p12.31	DNAJC1	rs11814448	22315843	C	A	0.0198678	5622	34274	5368/254/0|32953/1301/20	1.26 (1.09, 1.45)	0.00135628		401	24045	386/15/0|23098/931/16	1.02 (0.61, 1.72)	0.942313		0.943692		6023	34274	5754/269/0|32953/1301/20	1.25 (1.09, 1.43)	0.00170792
10q25.2	TCF7L2	rs7904519	114773927	G	A	0.456664	5619	34261	1525/2837/1257|10062/16988/7211	1.07 (1.03, 1.11)	0.00140861		401	24041	108/203/90|7011/11905/5125	1.06 (0.92, 1.22)	0.417441		0.34916		6020	34261	1633/3040/1347|10062/16988/7211	1.07 (1.02, 1.11)	0.00166133
2q31.1	METAP1D:DLX1:DLX2	rs2016394	172972971	A	G	0.477542	5617	34139	1625/2796/1196|9359/17045/7735	0.94 (0.90, 0.98)	0.00208439		399	23971	117/202/80|6512/12041/5418	0.89 (0.77, 1.03)	0.108243		0.653273		6016	34139	1742/2998/1276|9359/17045/7735	0.93 (0.90, 0.97)	0.00102988
10q26.12		rs11199914	123093901	A	G	0.318949	5622	34269	2706/2378/538|15917/14883/3469	0.93 (0.89, 0.98)	0.0025468		401	24043	199/164/38|11362/10357/2324	0.93 (0.79, 1.08)	0.332665		0.693138		6023	34269	2905/2542/576|15917/14883/3469	0.93 (0.89, 0.97)	0.00183613
1p13.2	AP4B1:DCLRE1B: HIPK1	rs12022378 / rs11552449	114448389	A	G	0.164971	5622	34272	3797/1668/157|24007/9313/952	1.09 (1.03, 1.15)	0.00286325		401	24045	274/114/13|16899/6503/643	1.07 (0.89, 1.29)	0.464124		0.925196		6023	34272	4071/1782/170|24007/9313/952	1.09 (1.03, 1.14)	0.00246255
11p15.5	LSP1	rs3817198	1909006	G	A	0.307281	5618	34263	2594/2404/620|16329/14750/3184	1.07 (1.02, 1.12)	0.0030402		401	24041	169/189/43|11375/10399/2267	1.11 (0.95, 1.28)	0.190719		0.549692		6019	34263	2763/2593/663|16329/14750/3184	1.07 (1.03, 1.12)	0.00189266
6q25.1	ESR1	rs2046210	151948366	A	G	0.33769	5622	34270	2380/2534/708|15024/15290/3956	1.06 (1.02, 1.11)	0.00540617		400	24043	158/195/47|10240/10918/2885	1.03 (0.89, 1.20)	0.694064		0.518857		6022	34270	2538/2729/755|15024/15290/3956	1.06 (1.02, 1.11)	0.00622888
2q14.2		rs4849887	121245122	A	G	0.0983732	5622	34274	4678/889/55|27793/6144/337	0.91 (0.84, 0.97)	0.00741906		401	24045	342/59/0|19454/4347/244	0.71 (0.54, 0.93)	0.0124468		0.106047		6023	34274	5020/948/55|27793/6144/337	0.89 (0.83, 0.96)	0.00140118
3p26.1	ITPR1:EGOT	rs6762644	4742276	G	A	0.396456	5621	34268	1981/2678/962|12674/16287/5307	1.06 (1.02, 1.10)	0.00774103		401	24043	120/216/65|8777/11583/3683	1.13 (0.98, 1.31)	0.0909237		0.981336		6022	34268	2101/2894/1027|12674/16287/5307	1.06 (1.02, 1.11)	0.00415173
6p25.3	FOXQ1	rs11242675	1318878	G	A	0.38838	5618	34206	2278/2556/784|13084/16244/4878	0.94 (0.90, 0.99)	0.00822005		400	23980	168/180/52|9167/11382/3431	0.92 (0.79, 1.07)	0.262638		0.697408		6018	34206	2446/2736/836|13084/16244/4878	0.94 (0.90, 0.98)	0.00467992
19q13.31	C19orf61:KCNN4:LYPD5:ZNF283	rs3760982	44286513	A	G	0.460651	5617	34246	1528/2783/1306|9907/16961/7378	1.06 (1.01, 1.10)	0.00903781		401	24039	108/187/106|6764/11957/5318	1.10 (0.96, 1.27)	0.174683		0.778791		6018	34246	1636/2970/1412|9907/16961/7378	1.06 (1.02, 1.10)	0.00509525
5q11.2	RAB3C	rs10472076	58184061	G	A	0.376015	5622	34272	2122/2668/832|13370/16133/4769	1.06 (1.01, 1.10)	0.00949803		401	24044	166/181/54|9342/11290/3412	0.97 (0.84, 1.12)	0.680827		0.27731		6023	34272	2288/2849/886|13370/16133/4769	1.05 (1.01, 1.10)	0.0151901
8p12		rs9693444	29509616	A	C	0.323743	5622	34272	2430/2601/591|15591/15108/3573	1.06 (1.01, 1.11)	0.0097102		401	24044	170/198/33|10959/10562/2523	1.04 (0.89, 1.21)	0.62055		0.629496		6023	34272	2600/2799/624|15591/15108/3573	1.06 (1.01, 1.10)	0.0103553
18q11.2		rs527616	24337424	G	C	0.379843	5622	34272	2283/2603/736|13326/15992/4954	0.95 (0.91, 0.99)	0.0119995		401	24043	166/186/49|9554/11166/3323	0.95 (0.82, 1.10)	0.503525		0.919824		6023	34272	2449/2789/785|13326/15992/4954	0.95 (0.91, 0.99)	0.0101463
14q24.1	RAD51L1	rs999737	69034682	A	G	0.230845	5619	34271	3375/1956/288|20191/12233/1847	0.94 (0.89, 0.99)	0.0124226		401	24044	233/144/24|14082/8641/1321	0.98 (0.83, 1.16)	0.813987		0.830573		6020	34271	3608/2100/312|20191/12233/1847	0.94 (0.90, 0.99)	0.0150015
3p24.1	TGFBR2	rs12493607	30682939	G	C	0.344393	5619	34267	2368/2568/683|14947/15317/4003	1.06 (1.01, 1.10)	0.012566		401	24043	162/202/37|10649/10692/2702	1.08 (0.93, 1.26)	0.317094		0.576953		6020	34267	2530/2770/720|14947/15317/4003	1.06 (1.01, 1.10)	0.00807309
16q23.2	CDYL2	rs13329835	80650805	G	A	0.223467	5622	34272	3304/2002/316|20644/11832/1796	1.06 (1.01, 1.12)	0.012764		401	24043	248/129/24|14524/8242/1277	1.03 (0.87, 1.22)	0.72095		0.689245		6023	34272	3552/2131/340|20644/11832/1796	1.06 (1.01, 1.11)	0.014263
8q24.21	MIR1208	rs11780156	129194641	A	G	0.159835	5621	34270	3847/1575/199|23990/9308/972	1.07 (1.01, 1.13)	0.0185888		401	24044	271/115/15|16723/6625/696	1.05 (0.88, 1.26)	0.593463		0.550905		6022	34270	4118/1690/214|23990/9308/972	1.07 (1.01, 1.12)	0.0189833
11q13.1	DKFZp761E198:OVOL1:SNX32:CFL1:MUS81	rs3903072	65583066	A	C	0.471389	5621	34263	1660/2746/1215|9567/17064/7632	0.95 (0.91, 0.99)	0.0198853		401	24042	121/181/99|6835/12063/5144	1.06 (0.92, 1.22)	0.447404		0.156943		6022	34263	1781/2927/1314|9567/17064/7632	0.96 (0.92, 1.00)	0.0396844
6q14.1		rs17529111	82128386	G	A	0.218198	5619	34260	3391/1948/280|21063/11607/1590	1.06 (1.01, 1.11)	0.0204017		401	24036	224/160/17|14957/8031/1048	1.25 (1.06, 1.48)	0.00918986		0.0420791		6020	34260	3615/2108/297|21063/11607/1590	1.07 (1.02, 1.13)	0.00391229
4q24	TET2	rs9790517	106084778	A	G	0.222668	5621	34262	3366/1964/291|20984/11646/1632	1.06 (1.01, 1.11)	0.0225064		401	24039	248/132/21|14926/8015/1098	1.10 (0.93, 1.31)	0.275204		0.858513		6022	34262	3614/2096/312|20984/11646/1632	1.06 (1.01, 1.11)	0.0150145
5p12		rs10941679	44706498	G	A	0.25408	5607	34141	3020/2195/392|18981/12950/2210	1.06 (1.01, 1.11)	0.0245306		400	24002	218/156/26|13406/9106/1490	1.05 (0.89, 1.23)	0.584445		0.613355		6007	34141	3238/2351/418|18981/12950/2210	1.05 (1.01, 1.10)	0.0237492
9p21.3	CDKN2A/B	rs1011970	22062134	A	C	0.166804	5622	34268	3816/1612/194|23807/9473/988	1.06 (1.01, 1.12)	0.025422		401	24043	278/112/11|16729/6625/689	0.97 (0.80, 1.17)	0.748629		0.734272		6023	34268	4094/1724/205|23807/9473/988	1.06 (1.00, 1.11)	0.037723
8q21.11	HNF4G	rs2943559	76417937	G	A	0.0722473	5583	33973	4740/804/39|29217/4581/175	1.09 (1.01, 1.18)	0.0321264		400	23911	331/68/1|20480/3298/133	1.19 (0.92, 1.53)	0.184485		0.685698		5983	33973	5071/872/40|29217/4581/175	1.09 (1.02, 1.18)	0.0188027
2p24.1		rs12710696	19320803	A	G	0.35622	5622	34272	2255/2564/803|14111/15790/4371	1.05 (1.00, 1.09)	0.0373626		401	24044	140/201/60|9920/11069/3055	1.17 (1.01, 1.35)	0.0343452		0.0966877		6023	34272	2395/2765/863|14111/15790/4371	1.05 (1.01, 1.10)	0.0116236
12p13.1		rs12422552	14413931	C	G	0.257001	5619	34273	3048/2153/418|18837/13168/2268	1.05 (1.00, 1.10)	0.047643		401	24045	224/147/30|13066/9338/1641	0.96 (0.82, 1.13)	0.655243		0.376642		6020	34273	3272/2300/448|18837/13168/2268	1.04 (1.00, 1.09)	0.0655739
5q11.2	PDE4D,PDE4DN2	rs1353747	58337481	C	A	0.0950481	5622	34266	4643/928/51|28039/5893/334	0.93 (0.87, 1.00)	0.0534797		401	24037	323/74/4|19549/4249/239	1.01 (0.80, 1.28)	0.93728		0.326933		6023	34266	4966/1002/55|28039/5893/334	0.94 (0.88, 1.01)	0.0697605
1p36.22	PEX14	rs616488	10566215	G	A	0.334125	5619	34267	2498/2529/592|15190/15153/3924	0.97 (0.92, 1.01)	0.113128		401	24043	184/170/47|10588/10659/2796	0.94 (0.80, 1.09)	0.388001		0.494033		6020	34267	2682/2699/639|15190/15153/3924	0.96 (0.92, 1.00)	0.0833896
7q35	ARHGEF5:NOBOX	rs720475	144074929	A	G	0.25376	5621	34274	3168/2108/345|18975/12962/2337	0.96 (0.92, 1.01)	0.13567		401	24045	226/145/30|13151/9208/1686	0.99 (0.84, 1.17)	0.920042		0.518047		6022	34274	3394/2253/375|18975/12962/2337	0.97 (0.92, 1.01)	0.149092
18q11.2	CHST9	rs1436904	24570667	C	A	0.400633	5621	34267	2120/2630/871|12300/16540/5427	0.97 (0.93, 1.01)	0.197414		401	24042	152/175/74|8466/11683/3893	1.00 (0.86, 1.15)	0.972474		0.952762		6022	34267	2272/2805/945|12300/16540/5427	0.97 (0.93, 1.01)	0.210266
14q32.11	CCDC88C	rs941764	91841069	G	A	0.33975	5615	34256	2403/2532/680|14848/15480/3928	1.03 (0.98, 1.07)	0.217718		401	24041	168/185/48|10415/10840/2786	1.03 (0.89, 1.20)	0.683035		0.712313		6016	34256	2571/2717/728|14848/15480/3928	1.03 (0.99, 1.07)	0.203155
22q13.1	MKL1	rs6001930	40876234	G	A	0.106897	5622	34273	4448/1104/70|27429/6426/418	1.04 (0.97, 1.11)	0.23467		401	24044	327/68/6|19371/4397/276	0.97 (0.77, 1.23)	0.82961		0.761895		6023	34273	4775/1172/76|27429/6426/418	1.04 (0.97, 1.11)	0.240933
14q24.1	RAD51L1	rs2588809	68660428	A	G	0.157324	5622	34271	3982/1486/154|24281/9112/878	1.03 (0.98, 1.09)	0.259407		400	24044	284/107/9|16912/6498/634	1.02 (0.84, 1.25)	0.814107		0.384846		6022	34271	4266/1593/163|24281/9112/878	1.03 (0.98, 1.09)	0.28777
2q31.1	CDCA7	rs1550623	174212894	G	A	0.15784	5616	34222	3986/1496/134|24211/9150/861	0.97 (0.92, 1.03)	0.283997		401	24004	295/97/9|16887/6507/610	0.82 (0.67, 1.00)	0.0503271		0.39394		6017	34222	4281/1593/143|24211/9150/861	0.96 (0.91, 1.01)	0.148854
16q12.2	FTO, KIAA1752	rs11075995	53855291	T	A	0.24088	5621	34272	3221/2079/321|19921/12453/1898	1.03 (0.98, 1.08)	0.315407		401	24043	229/148/24|14207/8563/1273	1.10 (0.93, 1.30)	0.255259		0.494106		6022	34272	3450/2227/345|19921/12453/1898	1.03 (0.98, 1.08)	0.224579
19p13.11	MERIT40	rs8170	17389704	A	G	0.190017	5619	34260	3631/1783/205|22434/10583/1243	1.02 (0.97, 1.08)	0.402017		401	24042	260/124/17|15736/7459/847	1.05 (0.88, 1.26)	0.576385		0.738954		6020	34260	3891/1907/222|22434/10583/1243	1.02 (0.97, 1.08)	0.372467
1q32.1	LGR6	rs6678914	202187176	A	G	0.413841	5621	34271	1910/2709/1002|11765/16714/5792	1.02 (0.98, 1.06)	0.414866		401	24044	164/191/46|8328/11696/4020	0.77 (0.67, 0.90)	0.000812101		0.000659153		6022	34271	2074/2900/1048|11765/16714/5792	1.00 (0.96, 1.04)	0.964958
8q21.11		rs6472903	76230301	C	A	0.177551	5612	34197	3831/1588/193|23124/10040/1033	0.98 (0.93, 1.03)	0.458514		399	24007	292/97/10|16355/6948/704	0.81 (0.66, 0.99)	0.0359988		0.106266		6011	34197	4123/1685/203|23124/10040/1033	0.97 (0.92, 1.02)	0.248162
5p15.33	TERT,hTERT	rs7726159	1282319	A	C	0.337758	5619	34255	2496/2483/640|15123/15254/3878	1.03 (0.99, 1.07)	0.195187		401	24037	162/184/55|10594/10714/2729	1.22 (1.05, 1.42)	0.0084516		0.253931		6020	34255	2658/2667/695|15123/15254/3878	1.04 (1.00, 1.09)	0.0687286
1q32.1	MDM4	rs4245739	204518842	C	A	0.25781	5622	34270	3110/2131/381|18767/13124/2379	0.99 (0.94, 1.03)	0.555296		401	24043	212/157/32|12874/9426/1743	1.01 (0.86, 1.19)	0.873244		0.970362		6023	34270	3322/2288/413|18767/13124/2379	0.99 (0.94, 1.03)	0.615909
19p13.11	MERIT40	rs2363956	17394124	A	C	0.486087	5619	34259	1496/2763/1360|9013/17039/8207	1.01 (0.97, 1.05)	0.590005		401	24038	96/210/95|6118/12004/5916	1.04 (0.90, 1.20)	0.584403		0.613025		6020	34259	1592/2973/1455|9013/17039/8207	1.01 (0.97, 1.06)	0.504929
5p15.33	TERT	rs10069690	1279790	A	G	0.260627	5618	34265	3076/2157/385|18837/13078/2350	1.01 (0.97, 1.06)	0.614874		401	24041	203/166/32|13348/9089/1604	1.18 (1.01, 1.38)	0.0397181		0.193875		6019	34265	3279/2323/417|18837/13078/2350	1.02 (0.98, 1.07)	0.349592
2q33.1	CASP8	rs1045485	202149589	G	C	0.129774	5618	34229	4267/1251/100|25947/7667/615	0.99 (0.93, 1.05)	0.767201		401	24042	302/90/9|18205/5390/447	1.03 (0.84, 1.27)	0.774121		0.669994		6019	34229	4569/1341/109|25947/7667/615	0.99 (0.94, 1.05)	0.838879
5p15.33	TERT	rs2736108	1297488	A	G	0.291942	5620	34263	2799/2370/451|17186/14106/2971	0.99 (0.95, 1.04)	0.793122		400	24043	197/175/28|11881/10002/2160	0.96 (0.82, 1.12)	0.597385		0.972768		6020	34263	2996/2545/479|17186/14106/2971	0.99 (0.95, 1.04)	0.743734
10p15.1	ANKRD16	rs2380205	5886734	A	G	0.440555	5620	34269	1812/2757/1051|10853/16838/6578	1.00 (0.96, 1.04)	0.976801		401	24041	127/207/67|7700/11784/4557	0.97 (0.84, 1.13)	0.729772		0.72593		6021	34269	1939/2964/1118|10853/16838/6578	1.00 (0.96, 1.04)	0.948445
