# Supplementary material for: Genetic Predisposition to In Situ and Invasive Lobular Carcinoma of the Breast
Source: PLOS journal article supplement (doi:10.1371/journal.pgen.1004285), 2014-04-17
Supplement: S14 (10.1371/journal.pgen.1004285.s014) [file journal.pgen.1004285.s014]

## Sheet: Sheet1
Table S6
							Ductal vs controls						Lobular vs controls						Mixed (Lobular/Ductal) vs controls						P-het	P-het
Cytoband	Genes	RS number	Position (NCBI Build 37)	Minor Allele	Other Allele	MAF	Cases	Controls	Genotype counts (cases | controls)	OR (95% CI)	P		Cases	Controls	Genotype counts (cases | controls)	OR (95% CI)	P		Cases	Controls	Genotype counts (cases | controls)	OR (95% CI)	P		Ductal vs Lobular	Ductal vs Mixed
10q26.13	FGFR2	rs2981579	123337335	A	G	0.404396	15023	29279	4175/7559/3289|10351/14139/4789	1.31 (1.27, 1.35)	1.16507e-71		3201	29279	846/1577/778|10351/14139/14139	1.42 (1.35, 1.50)	3.4e-38		690	17762	195/337/158|6206/8587/2969	1.37 (1.22, 1.54)	1.6e-07		0.0052801	0.623776
16q12.1	TOX3	rs3803662	52586341	A	G	0.261626	15022	29262	7062/6522/1438|15976/11186/2100	1.27 (1.23, 1.31)	4.58069e-47		3201	29262	1477/1415/309|15976/11186/11186	1.28 (1.21, 1.35)	3.6e-17		690	17755	345/276/69|9735/6804/1216	1.23 (1.08, 1.40)	0.00169606		0.69628	0.334851
11q13.3		rs554219	69331642	G	C	0.122726	15022	29273	10717/3960/345|22559/6292/422	1.34 (1.28, 1.39)	1.70142e-41		3199	29273	2270/845/84|22559/6292/6292	1.34 (1.24, 1.44)	9.4e-15		690	17759	508/157/25|13754/3752/253	1.25 (1.06, 1.47)	0.00825969		0.952249	0.440282
11q13.3		rs614367	69328764	A	G	0.148331	15023	29276	10124/4440/459|21229/7404/643	1.26 (1.21, 1.31)	7.94399e-30		3200	29276	2147/947/106|21229/7404/7404	1.25 (1.16, 1.34)	3.8e-10		690	17762	477/179/34|12920/4452/390	1.24 (1.06, 1.44)	0.00640721		0.873055	0.769893
11q13.3		c11_pos69088342 / rs75915166	69379161	A	C	0.0596558	15023	29281	12825/2110/88|25938/3233/110	1.36 (1.29, 1.44)	4.96926e-26		3200	29281	2720/463/17|25938/3233/3233	1.39 (1.25, 1.53)	2e-10		689	17763	594/93/2|15710/1992/61	1.17 (0.93, 1.47)	0.191255		0.606737	0.54861
2q35		rs13387042	217905832	G	A	0.491248	15018	29275	4567/7289/3162|7718/14559/6998	0.87 (0.84, 0.89)	8.2717e-22		3201	29275	1021/1512/668|7718/14559/14559	0.85 (0.80, 0.89)	9.5e-10		690	17759	218/347/125|4659/8851/4249	0.87 (0.78, 0.99)	0.0276468		0.343526	0.495351
5p12		rs10941679	44706498	G	A	0.253777	14962	29150	7586/6238/1138|16218/11049/1883	1.17 (1.13, 1.21)	3.96383e-21		3188	29150	1729/1243/216|16218/11049/11049	1.03 (0.97, 1.10)	0.318		689	17715	356/264/69|9850/6735/1130	1.21 (1.06, 1.38)	0.00395075		0.00015	0.39265
9q31.2		rs865686	110888478	C	A	0.381866	15019	29278	6382/6759/1878|11221/13803/4254	0.87 (0.85, 0.90)	6.28134e-19		3201	29278	1406/1438/357|11221/13803/13803	0.83 (0.79, 0.88)	9.2e-11		689	17762	308/313/68|6881/8346/2535	0.84 (0.74, 0.95)	0.00589537		0.130806	0.239286
5q11.2	MAP3K1	rs889312	56031884	C	A	0.276545	15020	29277	7320/6348/1352|15354/11665/2258	1.14 (1.10, 1.17)	9.92724e-15		3201	29277	1553/1351/297|15354/11665/11665	1.17 (1.10, 1.24)	1e-07		689	17761	321/323/45|9235/7117/1409	1.12 (0.99, 1.28)	0.0790578		0.342032	0.870921
10q21.2	ZNF365	rs10995190	64278682	A	G	0.15803	15021	29272	11061/3650/310|20761/7769/742	0.87 (0.84, 0.91)	4.06573e-11		3201	29272	2408/747/46|20761/7769/7769	0.76 (0.71, 0.83)	1.2e-11		690	17761	510/172/8|12646/4685/430	0.74 (0.62, 0.87)	0.00039		0.00202319	0.3666
3p24.1	SLC4A7	rs4973768	27416013	A	G	0.468164	14994	29205	3767/7635/3592|8184/14572/6449	1.10 (1.07, 1.14)	7.15283e-11		3191	29205	832/1581/778|8184/14572/14572	1.11 (1.05, 1.17)	0.00021		690	17722	162/351/177|4908/8927/3887	1.20 (1.06, 1.35)	0.00314939		0.955295	0.436119
12q24.21		rs1292011	115836522	G	A	0.417521	15016	29265	5531/7168/2317|10017/14172/5076	0.91 (0.88, 0.93)	1.23428e-10		3199	29265	1196/1508/495|10017/14172/14172	0.91 (0.86, 0.96)	0.001		689	17749	250/328/111|6043/8560/3146	0.98 (0.87, 1.10)	0.683981		0.846365	0.692075
8q24.21		rs13281615	128355618	G	A	0.40556	14715	28585	4704/7277/2734|9957/13980/4648	1.10 (1.07, 1.14)	1.87837e-10		3121	28585	1006/1541/574|9957/13980/13980	1.10 (1.04, 1.16)	0.001		671	17281	225/330/116|5850/8517/2914	0.99 (0.87, 1.11)	0.809497		0.897825	0.097551
12q22	NTN4	rs17356907	96027759	G	A	0.301146	14997	29246	7757/6018/1222|14292/12216/2738	0.91 (0.88, 0.94)	2.15864e-09		3193	29246	1622/1331/240|14292/12216/12216	0.89 (0.84, 0.95)	0.00012		686	17729	377/254/55|8732/7379/1618	0.86 (0.75, 0.98)	0.027723		0.812259	0.606042
1p11.2		rs11249433	121280613	G	A	0.399734	15023	29273	4966/7361/2696|10442/14174/4657	1.09 (1.06, 1.13)	2.31008e-09		3201	29273	916/1633/652|10442/14174/14174	1.28 (1.22, 1.35)	7.1e-20		690	17757	217/341/132|6203/8605/2949	1.13 (1.00, 1.27)	0.0494739		2.7e-08	0.342698
8q21.11		rs6472903	76230301	C	A	0.177878	14990	29204	10553/4036/401|19727/8602/875	0.89 (0.85, 0.92)	2.92383e-09		3192	29204	2165/912/115|19727/8602/8602	1.00 (0.93, 1.07)	0.895		688	17724	472/195/21|11997/5199/528	0.99 (0.85, 1.16)	0.926797		0.00408231	0.495484
4q34.1	ADAM29	rs6828523	175846426	A	C	0.120181	15021	29269	12004/2839/178|22630/6215/424	0.87 (0.83, 0.91)	8.28927e-09		3199	29269	2579/588/32|22630/6215/6215	0.82 (0.75, 0.90)	8e-06		689	17755	538/135/16|13737/3763/255	0.97 (0.81, 1.16)	0.70171		0.19779	0.211281
14q24.1	RAD51L1	rs2588809	68660428	A	G	0.158031	15021	29278	10227/4306/488|20707/7803/768	1.12 (1.08, 1.17)	8.67864e-09		3201	29278	2287/829/85|20707/7803/7803	0.99 (0.92, 1.07)	0.87		690	17760	479/192/19|12566/4737/457	1.04 (0.89, 1.22)	0.605706		0.00130151	0.247004
12p11.22	PTHLH	rs10771399	28155080	G	A	0.119045	15024	29277	12100/2742/182|22826/6037/414	0.87 (0.83, 0.91)	1.24899e-08		3201	29277	2601/572/28|22826/6037/6037	0.84 (0.77, 0.92)	9.3e-05		690	17760	558/123/9|13780/3727/253	0.84 (0.69, 1.02)	0.0753812		0.432805	0.723599
10q22.3	ZMIZ1	rs704010	80841148	A	G	0.379991	15019	29274	5383/7157/2479|11299/13665/4310	1.09 (1.06, 1.12)	1.63826e-08		3201	29274	1127/1520/554|11299/13665/13665	1.14 (1.08, 1.21)	8.9e-07		689	17758	207/371/111|6709/8339/2710	1.24 (1.10, 1.39)	0.000573054		0.131942	0.0242279
16q23.2	CDYL2	rs13329835	80650805	G	A	0.22436	15021	29279	8606/5510/905|17581/10143/1555	1.10 (1.06, 1.14)	3.10333e-08		3201	29279	1864/1160/177|17581/10143/10143	1.04 (0.98, 1.11)	0.19056		690	17763	401/248/41|10669/6178/916	1.05 (0.91, 1.20)	0.527787		0.181886	0.515895
11q13.1	DKFZp761E198:OVOL1:SNX32:CFL1:MUS81	rs3903072	65583066	A	C	0.473051	15018	29270	4398/7537/3083|8108/14576/6586	0.92 (0.90, 0.95)	7.55885e-08		3200	29270	921/1569/710|8108/14576/14576	0.95 (0.90, 1.00)	0.0430283		689	17757	227/316/146|4936/8859/3962	0.84 (0.75, 0.95)	0.00456581		0.384216	0.0420104
14q24.1	RAD51L1	rs999737	69034682	A	G	0.229812	15018	29278	9246/5036/736|17290/10429/1559	0.91 (0.88, 0.94)	2.2593e-07		3198	29278	1941/1113/144|17290/10429/10429	0.93 (0.88, 1.00)	0.0346063		690	17760	427/231/32|10360/6400/1000	0.92 (0.79, 1.06)	0.229208		0.513418	0.636685
3p24.1	TGFBR2	rs12493607	30682939	G	C	0.346896	15014	29274	6251/6761/2002|12681/13111/3482	1.08 (1.05, 1.12)	2.80143e-07		3198	29274	1317/1460/421|12681/13111/13111	1.07 (1.01, 1.13)	0.0136203		690	17760	278/326/86|7917/7797/2046	1.07 (0.95, 1.21)	0.277114		0.451579	0.65539
22q13.1	MKL1	rs6001930	40876234	G	A	0.107237	15024	29280	11680/3155/189|23413/5513/354	1.13 (1.08, 1.18)	3.43706e-07		3201	29280	2502/657/42|23413/5513/5513	1.06 (0.98, 1.15)	0.151782		690	17763	531/153/6|14332/3249/182	1.13 (0.94, 1.35)	0.199117		0.270088	0.78515
8q21.11	HNF4G	rs2943559	76417937	G	A	0.0720047	14902	29002	12503/2296/103|24957/3892/153	1.15 (1.09, 1.21)	6.04879e-07		3170	29002	2721/424/25|24957/3892/3892	1.06 (0.96, 1.17)	0.267219		690	17639	571/111/8|15036/2501/102	1.23 (1.00, 1.51)	0.049571		0.0754005	0.33474
6q25.1	C6orf97	rs12662670	151918856	C	A	0.0724069	15023	29281	12621/2285/117|25135/3984/162	1.15 (1.09, 1.21)	7.16793e-07		3200	29281	2697/475/28|25135/3984/3984	1.18 (1.07, 1.30)	0.000778137		690	17763	577/109/4|15150/2517/96	1.18 (0.96, 1.46)	0.122768		0.505496	0.704006
3p26.1	ITPR1:EGOT	rs6762644	4742276	G	A	0.39509	15020	29275	5262/7315/2443|10945/13825/4505	1.08 (1.05, 1.11)	8.59046e-07		3201	29275	1176/1500/525|10945/13825/13825	1.04 (0.98, 1.09)	0.202834		689	17758	250/344/95|6707/8329/2722	1.09 (0.97, 1.23)	0.140735		0.251009	0.935178
11p15.5	LSP1	rs3817198	1909006	G	A	0.305898	15015	29272	6899/6545/1571|13987/12625/2660	1.08 (1.05, 1.11)	1.76128e-06		3198	29272	1506/1341/351|13987/12625/12625	1.08 (1.02, 1.15)	0.005898		689	17756	304/312/73|8318/7803/1635	1.07 (0.94, 1.21)	0.322567		0.876905	0.397903
14q32.11	CCDC88C	rs941764	91841069	G	A	0.339351	15008	29264	6134/7009/1865|12706/13211/3347	1.08 (1.04, 1.11)	3.42261e-06		3198	29264	1362/1439/397|12706/13211/13211	1.04 (0.99, 1.10)	0.1291		688	17752	246/353/89|7734/7967/2051	1.25 (1.11, 1.41)	0.00036		0.143402	0.0787048
19p13.11	SSBP4:ISYNA1:ELL	rs4808801	18571141	G	A	0.348697	15012	29271	6691/6715/1606|12463/13204/3604	0.93 (0.90, 0.96)	3.59204e-06		3199	29271	1426/1416/357|12463/13204/13204	0.92 (0.87, 0.98)	0.00537658		689	17754	304/323/62|7714/7947/2093	0.92 (0.81, 1.05)	0.212381		0.924838	0.400074
21q21.1	NRIP1	rs2823093	16520832	A	G	0.268392	15023	29279	8348/5713/962|15689/11509/2081	0.92 (0.89, 0.96)	4.1552e-06		3201	29279	1824/1168/209|15689/11509/11509	0.91 (0.85, 0.96)	0.00145868		690	17762	372/270/48|9328/7145/1289	0.96 (0.84, 1.09)	0.507468		0.444261	0.778387
2q31.1	METAP1D:DLX1:DLX2	rs2016394	172972971	A	G	0.476576	14973	29154	4375/7434/3164|8031/14550/6573	0.93 (0.91, 0.96)	4.55661e-06		3199	29154	930/1595/674|8031/14550/14550	0.93 (0.88, 0.98)	0.00972811		685	17700	183/345/157|4943/8847/3910	0.99 (0.88, 1.11)	0.820833		0.832375	0.169883
7q35	ARHGEF5:NOBOX	rs720475	144074929	A	G	0.25371	15021	29281	8589/5560/872|16181/11105/1995	0.92 (0.89, 0.96)	5.52281e-06		3200	29281	1792/1193/215|16181/11105/11105	0.99 (0.93, 1.05)	0.700925		690	17763	423/225/42|9745/6777/1241	0.86 (0.74, 0.98)	0.0275877		0.0500939	0.104815
14q13.3	PAX9:SLC25A21	rs2236007	37132769	A	G	0.209994	15021	29275	9782/4625/614|18277/9690/1308	0.92 (0.89, 0.95)	5.56329e-06		3200	29275	2112/973/115|18277/9690/9690	0.88 (0.82, 0.94)	0.00025		690	17759	454/208/28|11049/5901/809	0.84 (0.73, 0.98)	0.0253897		0.183203	0.272922
19q13.31	C19orf61:KCNN4:LYPD5:ZNF283	rs3760982	44286513	A	G	0.458972	15011	29254	4083/7428/3500|8513/14486/6255	1.07 (1.04, 1.10)	6.84609e-06		3198	29254	907/1587/704|8513/14486/14486	1.03 (0.98, 1.09)	0.272029		687	17754	174/352/161|4977/8866/3911	1.08 (0.96, 1.21)	0.205614		0.18913	0.874314
17q22	COX11	rs6504950	53056471	A	G	0.276711	15020	29278	8109/5868/1043|15189/11788/2301	0.93 (0.90, 0.96)	7.97851e-06		3199	29278	1731/1246/222|15189/11788/11788	0.92 (0.87, 0.98)	0.00887297		690	17760	371/267/52|9231/7110/1419	0.98 (0.86, 1.12)	0.780395		0.947064	0.47271
5q33.3	EBF1	rs1432679	158244083	G	A	0.43182	14999	29231	4583/7384/3032|9487/14299/5445	1.07 (1.04, 1.10)	9.14366e-06		3196	29231	992/1554/650|9487/14299/14299	1.08 (1.02, 1.14)	0.00555093		690	17745	224/312/154|5744/8708/3293	1.11 (0.99, 1.25)	0.0832722		0.686081	0.356851
10p12.31	MLLT10:DNAJC1	rs7072776	22032942	A	G	0.285266	15022	29275	7357/6311/1354|14932/11929/2414	1.07 (1.04, 1.11)	1.02968e-05		3201	29275	1542/1391/268|14932/11929/11929	1.10 (1.04, 1.16)	0.00173036		690	17762	316/315/59|9052/7276/1434	1.13 (0.99, 1.28)	0.0650357		0.487515	0.532246
8q24.21	MIR1208	rs11780156	129194641	A	G	0.158598	15024	29277	10215/4335/474|20519/7952/806	1.09 (1.05, 1.13)	1.05255e-05		3200	29277	2209/888/103|20519/7952/7952	1.07 (1.00, 1.15)	0.0487588		689	17760	470/190/29|12240/4983/537	1.08 (0.93, 1.25)	0.33324		0.834423	0.61994
10q26.12		rs11199914	123093901	A	G	0.319502	15024	29277	7223/6414/1387|13559/12759/2959	0.93 (0.90, 0.96)	1.46154e-05		3201	29277	1509/1369/323|13559/12759/12759	0.95 (0.89, 1.00)	0.0641923		690	17760	353/286/51|8304/7700/1756	0.85 (0.74, 0.97)	0.0147299		0.421296	0.100514
16q12.2	MIR1972-2:FTO	rs17817449	53813367	C	A	0.404009	15022	29275	5647/7089/2286|10506/13939/4830	0.94 (0.91, 0.97)	3.66759e-05		3201	29275	1219/1511/471|10506/13939/13939	0.91 (0.87, 0.96)	0.00106642		690	17761	268/313/109|6437/8401/2923	0.89 (0.79, 1.00)	0.0509569		0.320424	0.683527
6q25.1	ESR1	rs2046210	151948366	A	G	0.335293	15021	29278	6333/6855/1833|12956/12990/3332	1.07 (1.03, 1.10)	4.30455e-05		3201	29278	1428/1396/377|12956/12990/12990	1.04 (0.98, 1.10)	0.160908		690	17761	284/332/74|7640/8044/2077	1.11 (0.98, 1.25)	0.111583		0.353812	0.931165
1p13.2	AP4B1:DCLRE1B: HIPK1	rs12022378 / rs11552449	114448389	A	G	0.164862	15023	29279	10243/4313/467|20529/7934/816	1.08 (1.04, 1.12)	6.775e-05		3201	29279	2166/943/92|20529/7934/7934	1.08 (1.01, 1.16)	0.0239617		690	17762	467/192/31|12457/4799/506	1.19 (1.03, 1.38)	0.022199		0.845423	0.12318
9q31.2		rs10759243	110306115	A	C	0.289612	15020	29273	7311/6322/1387|14737/12034/2502	1.07 (1.03, 1.10)	9.67462e-05		3199	29273	1537/1343/319|14737/12034/12034	1.09 (1.03, 1.16)	0.00247523		690	17757	330/303/57|8981/7296/1480	1.06 (0.94, 1.21)	0.351142		0.436317	0.533717
18q11.2	CHST9	rs1436904	24570667	C	A	0.399968	15019	29274	5685/7212/2122|10536/14144/4594	0.94 (0.91, 0.97)	0.000103516		3200	29274	1256/1447/497|10536/14144/14144	0.96 (0.91, 1.01)	0.126697		689	17757	255/338/96|6357/8560/2840	0.95 (0.84, 1.07)	0.375385		0.772839	0.489857
10p12.31	MLLT10	rs1243182	21916728	A	G	0.323523	15022	29279	6538/6780/1704|13349/12844/3086	1.07 (1.04, 1.10)	1.42213e-05		3200	29279	1356/1494/350|13349/12844/12844	1.10 (1.04, 1.16)	0.000815877		690	17762	278/338/74|8082/7826/1854	1.10 (0.97, 1.25)	0.126862		0.396577	0.654319
2q35	DIRC3	rs16857609	218296508	A	G	0.263966	15017	29273	7851/6033/1133|15905/11402/1966	1.07 (1.03, 1.10)	0.000162439		3200	29273	1657/1278/265|15905/11402/11402	1.10 (1.04, 1.17)	0.00112157		689	17757	374/255/60|9763/6818/1176	1.06 (0.93, 1.20)	0.416175		0.305624	0.819273
6q14.1		rs17529111	82128386	G	A	0.219995	15016	29268	8961/5254/801|17909/9973/1386	1.07 (1.03, 1.11)	0.000201743		3198	29268	1874/1152/172|17909/9973/9973	1.08 (1.01, 1.15)	0.016723		689	17753	431/230/28|11017/5933/803	0.93 (0.81, 1.07)	0.32784		0.74887	0.0900082
2q31.1	CDCA7	rs1550623	174212894	G	A	0.156228	15015	29229	10886/3798/331|20756/7760/713	0.93 (0.89, 0.96)	0.000210546		3200	29229	2272/849/79|20756/7760/7760	1.01 (0.94, 1.08)	0.838894		690	17749	514/159/17|12425/4867/457	0.89 (0.75, 1.05)	0.16308		0.0305087	0.295603
6p23	RABBP9	rs204247	13722523	G	A	0.442637	15021	29275	4443/7579/2999|9179/14340/5756	1.05 (1.02, 1.09)	0.000483374		3200	29275	920/1605/675|9179/14340/14340	1.10 (1.05, 1.16)	0.000284973		690	17758	206/350/134|5551/8706/3501	1.04 (0.93, 1.17)	0.504279		0.107862	0.831276
10p12.31	DNAJC1	rs11814448	22315843	C	A	0.0200665	15024	29281	14358/654/12|28137/1128/16	1.18 (1.07, 1.30)	0.00130359		3201	29281	3049/152/0|28137/1128/1128	1.30 (1.09, 1.55)	0.0035207		690	17763	649/41/0|17122/634/7	1.71 (1.19, 2.45)	0.00357554		0.416297	0.196516
10q25.2	TCF7L2	rs7904519	114773927	G	A	0.456117	15007	29268	4222/7419/3366|8609/14511/6148	1.05 (1.02, 1.08)	0.00118286		3198	29268	911/1603/684|8609/14511/14511	1.02 (0.97, 1.08)	0.381201		690	17751	189/330/171|5122/8777/3852	1.09 (0.97, 1.23)	0.126974		0.484133	0.460764
22q12.2	EMID1:RHBDD3:EWSR1	rs132390	29621477	G	A	0.0360106	15023	29281	13879/1123/21|27279/1971/31	1.14 (1.06, 1.23)	0.000733143		3201	29281	2944/250/7|27279/1971/1971	1.22 (1.07, 1.40)	0.00381025		690	17763	636/54/0|16574/1169/20	1.21 (0.89, 1.65)	0.227142		0.489217	0.683964
8p12		rs9693444	29509616	A	C	0.324618	15022	29279	6538/6769/1715|13282/12917/3080	1.05 (1.02, 1.09)	0.00110858		3201	29279	1399/1473/329|13282/12917/12917	1.03 (0.98, 1.09)	0.254606		690	17761	286/316/88|8047/7819/1895	1.16 (1.03, 1.31)	0.0178935		0.317827	0.118558
11q24.3		rs11820646	129461171	A	G	0.410505	15022	29281	5427/7116/2479|10153/14202/4926	0.95 (0.93, 0.98)	0.00233219		3200	29281	1154/1530/516|10153/14202/14202	0.94 (0.89, 0.99)	0.0158		690	17763	265/315/110|6151/8691/2921	0.92 (0.82, 1.04)	0.165691		0.630511	0.641784
18q11.2		rs527616	24337424	G	C	0.381882	15024	29279	6025/6945/2054|11303/13699/4277	0.96 (0.93, 0.98)	0.00286827		3201	29279	1219/1533/449|11303/13699/13699	0.99 (0.93, 1.04)	0.608859		690	17763	266/337/87|7080/8186/2497	0.97 (0.86, 1.10)	0.660504		0.323762	0.778577
5q11.2	PDE4D,PDE4DN2	rs1353747	58337481	C	A	0.0943286	15020	29273	12408/2485/127|23991/5006/276	0.93 (0.88, 0.97)	0.00302695		3201	29273	2654/517/30|23991/5006/5006	0.95 (0.87, 1.04)	0.297331		690	17763	571/116/3|14390/3198/175	0.86 (0.70, 1.06)	0.165638		0.700078	0.372146
1p36.22	PEX14	rs616488	10566215	G	A	0.332162	15020	29274	6808/6659/1553|13049/12923/3302	0.96 (0.93, 0.99)	0.00660012		3199	29274	1446/1419/334|13049/12923/12923	0.96 (0.91, 1.02)	0.212885		690	17757	330/301/59|7794/7909/2054	0.88 (0.78, 1.00)	0.0548308		0.862393	0.151737
2q14.2		rs4849887	121245122	A	G	0.0980611	15024	29281	12381/2496/147|23775/5205/301	0.94 (0.89, 0.98)	0.0089162		3201	29281	2698/467/36|23775/5205/5205	0.88 (0.80, 0.97)	0.00809091		690	17763	580/107/3|14292/3284/187	0.80 (0.65, 0.99)	0.0378118		0.0985777	0.121027
5p15.33	TERT	rs2736108	1297488	A	G	0.291075	15016	29271	7736/6056/1224|14728/12038/2505	0.96 (0.93, 0.99)	0.0107767		3199	29271	1607/1340/252|14728/12038/12038	1.00 (0.95, 1.06)	0.946967		690	17754	383/262/45|8741/7425/1588	0.81 (0.71, 0.92)	0.0015902		0.151903	0.089303
12p13.1		rs12422552	14413931	C	G	0.256164	15022	29280	8159/5762/1101|16137/11209/1934	1.04 (1.01, 1.07)	0.0219565		3199	29280	1754/1216/229|16137/11209/11209	1.04 (0.98, 1.11)	0.163879		690	17762	373/260/57|9662/6866/1234	1.02 (0.90, 1.17)	0.74136		0.85892	0.571386
9p21.3	CDKN2A/B	rs1011970	22062134	A	C	0.166183	15021	29275	10267/4301/453|20371/8064/840	1.05 (1.01, 1.09)	0.0245959		3201	29275	2167/926/108|20371/8064/8064	1.08 (1.01, 1.16)	0.0261353		690	17760	456/211/23|12340/4888/532	1.22 (1.05, 1.42)	0.00880932		0.471609	0.0692366
4q24	TET2	rs9790517	106084778	A	G	0.225802	15017	29269	8964/5274/779|17786/10058/1425	1.04 (1.00, 1.08)	0.0315732		3200	29269	1875/1159/166|17786/10058/10058	1.06 (0.99, 1.13)	0.0850069		690	17757	423/228/39|10914/6022/821	0.95 (0.82, 1.10)	0.481524		0.505336	0.2445
6p25.3	FOXQ1	rs11242675	1318878	G	A	0.389828	15012	29223	5948/6970/2094|11149/13900/4174	0.97 (0.94, 1.00)	0.0382219		3199	29223	1307/1438/454|11149/13900/13900	0.93 (0.88, 0.99)	0.0158		689	17717	273/327/89|6803/8440/2474	0.97 (0.86, 1.10)	0.661369		0.209544	0.404898
5q11.2	RAB3C	rs10472076	58184061	G	A	0.376692	15020	29279	5793/7053/2174|11413/13766/4100	1.03 (1.00, 1.06)	0.0485017		3201	29279	1182/1534/485|11413/13766/13766	1.07 (1.02, 1.13)	0.00902182		688	17762	289/305/94|6964/8328/2470	0.90 (0.80, 1.02)	0.0929022		0.0865725	0.219732
2q33.1	CASP8	rs1045485	202149589	G	C	0.12959	15015	29236	11486/3293/236|22169/6548/519	0.96 (0.92, 1.00)	0.0624507		3197	29236	2445/698/54|22169/6548/6548	0.97 (0.90, 1.05)	0.464208		689	17751	512/164/13|13407/4034/310	1.08 (0.91, 1.28)	0.36247		0.539614	0.113853
10p15.1	ANKRD16	rs2380205	5886734	A	G	0.441867	15023	29276	4899/7374/2750|9252/14354/5670	0.97 (0.95, 1.00)	0.0754693		3199	29276	1003/1581/615|9252/14354/14354	1.01 (0.96, 1.07)	0.676082		690	17762	217/340/133|5703/8766/3293	0.99 (0.88, 1.11)	0.83782		0.145815	0.26134
19p13.11	MERIT40	rs2363956	17394124	A	C	0.485352	15010	29267	4000/7612/3398|7738/14518/7011	0.98 (0.95, 1.01)	0.122054		3198	29267	880/1546/772|7738/14518/14518	1.00 (0.95, 1.05)	0.98847		690	17751	163/361/166|4700/8733/4318	1.02 (0.91, 1.15)	0.732115		0.387207	0.219753
5p15.33	TERT,hTERT	rs7726159	1282319	A	C	0.340119	15014	29263	6511/6791/1712|12822/13067/3374	1.02 (0.99, 1.06)	0.135511		3198	29263	1393/1453/352|12822/13067/13067	1.02 (0.96, 1.08)	0.482013		688	17755	318/297/73|7927/7827/2001	0.97 (0.85, 1.10)	0.596445		0.88776	0.359739
1q32.1	LGR6	rs6678914	202187176	A	G	0.413583	15021	29278	5090/7296/2635|10076/14263/4939	1.02 (0.99, 1.05)	0.141498		3200	29278	1070/1562/568|10076/14263/14263	1.03 (0.97, 1.08)	0.325511		690	17760	231/343/116|6173/8646/2941	1.02 (0.90, 1.15)	0.761765		0.843959	0.834831
5p15.33	TERT	rs10069690	1279790	A	G	0.261798	15010	29273	8106/5878/1026|16036/11203/2034	1.02 (0.99, 1.05)	0.24175		3197	29273	1724/1269/204|16036/11203/11203	1.01 (0.95, 1.07)	0.836281		689	17757	365/282/42|9914/6669/1174	1.06 (0.92, 1.21)	0.430764		0.669088	0.525922
16q12.2	FTO, KIAA1752	rs11075995	53855291	T	A	0.242546	15024	29280	8597/5530/897|16968/10657/1655	1.02 (0.99, 1.06)	0.242747		3200	29280	1817/1187/196|16968/10657/10657	1.02 (0.96, 1.08)	0.608738		690	17762	406/249/35|10523/6282/957	0.96 (0.83, 1.10)	0.536501		0.889536	0.753875
1q32.1	MDM4	rs4245739	204518842	C	A	0.256264	15023	29277	8276/5743/1004|16097/11170/2010	0.99 (0.96, 1.02)	0.582159		3201	29277	1800/1195/206|16097/11170/11170	0.99 (0.93, 1.06)	0.821214		690	17761	388/254/48|9562/6917/1282	0.93 (0.82, 1.07)	0.313271		0.998625	0.576406
2p24.1		rs12710696	19320803	A	G	0.355378	15023	29279	6157/6861/2005|12107/13451/3721	1.01 (0.98, 1.04)	0.660114		3201	29279	1275/1498/428|12107/13451/13451	1.05 (0.99, 1.11)	0.107555		689	17763	292/302/95|7223/8238/2302	1.01 (0.89, 1.14)	0.901129		0.287045	0.46653
19p13.11	MERIT40	rs8170	17389704	A	G	0.190031	15018	29267	9848/4616/554|19151/9052/1064	1.00 (0.96, 1.03)	0.840754		3198	29267	2060/1014/124|19151/9052/9052	1.02 (0.96, 1.09)	0.539711		690	17759	441/229/20|11720/5418/621	1.02 (0.88, 1.18)	0.813136		0.471459	0.833033
