# Supplementary material for: Genetic Predisposition to In Situ and Invasive Lobular Carcinoma of the Breast
Source: PLOS journal article supplement (doi:10.1371/journal.pgen.1004285), 2014-04-17
Supplement: S16 (10.1371/journal.pgen.1004285.s016) [file journal.pgen.1004285.s016]

**Table S8**

| **UK study** | **No of Lobular Cases** | **Total No of controls** | **Source of Controls** | **No of controls selected for BCAC analysis** | **No of controls selected for GLACIER analysis** |
| --- | --- | --- | --- | --- | --- |
| **BBCS**  British Breast Cancer Study | 83 | 1397 | A friend or non-blood relative of cases, recruited from throughout UK | 166 | 1231 |
| **SBCS**  Sheffield Breast Cancer Study | 72 | 848 | Unselected women attending Sheffield Mammography Screening Service with no evidence of a breast lesion | 144 | 704 |
| **UKBGS**  Breakthrough Generations Study | 50 | 470 | Women from throughout the UK who had not had breast cancer or in situ disease before entry into the cohort study | 100 | 370 |
| **SEARCH**  Study of Epidemiology & Risk Factors in Cancer Heredity | 1234 | 8069 | (a) from the EPIC-Norfolk cohort study, (b) women attending GP practices, matched to cases by age and geographic region (East Anglia) | 5374 | 2695 |
| **Total** | **1,439** | **10,784** |  | **5,784** | **5,000** |
